# 1 Towards chemical accuracy for 2 alchemical free energy calculations with 3 hybrid physics-based machine learning / 4 molecular mechanics potentials

5 **Dominic A. Rufa** 0000-0003-0930-9445<sup>1,2</sup>, **Hannah E. Bruce Macdonald** 0000-0002-5562-6866<sup>1</sup>, **Josh Fass**  
6 **0000-0003-3719-266X**<sup>1,3</sup>, **Marcus Wieder** 0000-0003-2631-8415<sup>1,8</sup>, **Patrick B. Grinaway** 0000-0002-9762-4201<sup>1,4,5</sup>,  
7 **Adrian E. Roitberg** 0000-0003-3963-8784<sup>6</sup>, **Olexandr Isayev** 0000-0001-7581-8497<sup>7</sup>, **John D. Chodera**  
8 **0000-0003-0542-119X**<sup>1\*</sup>

9 <sup>1</sup>Computational and Systems Biology Program, Sloan Kettering Institute, Memorial Sloan Kettering Cancer Center, New  
10 York, NY 10065, USA; <sup>2</sup>Tri-Institutional PhD Program in Chemical Biology, Weill Cornell Graduate School of Medical  
11 Sciences, New York, NY 10065, USA; <sup>3</sup>Tri-Institutional PhD Program in Computational Biology and Medicine, Weill  
12 Cornell Graduate School of Medical Sciences, New York, NY 10065, USA; <sup>4</sup>Physiology, Biophysics, and Systems Biology  
13 Graduate Program, Weill Cornell Graduate School of Medical Sciences and Computational and Systems Biology  
14 Program, Sloan Kettering Institute, Memorial Sloan Kettering Cancer Center, New York, NY 10065, USA; <sup>5</sup>Onai, New York,  
15 NY; <sup>6</sup>Department of Chemistry, University of Florida; <sup>7</sup>Department of Chemistry, Carnegie Mellon University;  
16 <sup>8</sup>Department of Pharmaceutical Chemistry, University of Vienna, Austria

17 **\*For correspondence:**

18 [john.chodera@choderalab.org](mailto:john.chodera@choderalab.org) (JDC)

---

20 **Abstract** Alchemical free energy methods with molecular mechanics (MM) force fields are now widely  
21 used in the prioritization of small molecules for synthesis in structure-enabled drug discovery projects be-  
22 cause of their ability to deliver 1–2 kcal mol<sup>-1</sup> accuracy in well-behaved protein-ligand systems. Surpassing  
23 this accuracy limit would significantly reduce the number of compounds that must be synthesized to achieve  
24 desired potencies and selectivities in drug design campaigns. However, MM force fields pose a challenge  
25 to achieving higher accuracy due to their inability to capture the intricate atomic interactions of the phys-  
26 ical systems they model. A major limitation is the accuracy with which ligand intramolecular energetics—  
27 especially torsions—can be modeled, as poor modeling of torsional profiles and coupling with other va-  
28 lence degrees of freedom can have a significant impact on binding free energies. Here, we demonstrate  
29 how a new generation of hybrid machine learning / molecular mechanics (ML/MM) potentials can deliver  
30 significant accuracy improvements in modeling protein-ligand binding affinities. Using a nonequilibrium  
31 perturbation approach, we can correct a standard, GPU-accelerated MM alchemical free energy calculation  
32 in a simple post-processing step to efficiently recover ML/MM free energies and deliver a significant accu-  
33 racy improvement with small additional computational effort. To demonstrate the utility of ML/MM free  
34 energy calculations, we apply this approach to a benchmark system for predicting kinase:inhibitor binding  
35 affinities—a congeneric ligand series for non-receptor tyrosine kinase TYK2 (Tyk2)—wherein state-of-the-  
36 art MM free energy calculations (with OPLS2.1) achieve inaccuracies of 0.93±0.12 kcal mol<sup>-1</sup> in predicting  
37 absolute binding free energies. Applying an ML/MM hybrid potential based on the ANI2x ML model and  
38 AMBER14SB/TIP3P with the OpenFF 1.0.0 (“Parsley”) small molecule force field as an MM model, we show  
39 that it is possible to significantly reduce the error in absolute binding free energies from 0.97 [95% CI: 0.68,  
40 1.21] kcal mol<sup>-1</sup> (MM) to 0.47 [95% CI: 0.31, 0.63] kcal mol<sup>-1</sup> (ML/MM).

## 42 Introduction

43 MM force fields are widely used in structure-enabled drug discovery

44 Alchemical free energy calculations are now widely used in structure-enabled drug discovery programs to  
45 optimize or maintain potency [1–5]. Typically, relative alchemical free energy methods can predict affinities  
46 with accuracies of 1–2 kcal mol<sup>-1</sup> in prospective use in well-behaved, structure-enabled programs [3, 6].  
47 While an accuracy of 1 kcal mol<sup>-1</sup> is already sufficient to greatly reduce the number of compounds that must  
48 be synthesized to achieve desired potency gains, the ability to further improve this accuracy to 0.5 kcal mol<sup>-1</sup>  
49 (“chemical accuracy” [7]) would deliver significant benefits at least as large as the improvement achieved by  
50 accuracy improvements from 2 kcal mol<sup>-1</sup> to 1 kcal mol<sup>-1</sup> for optimization of potency [8, 9] and selectivity [10,  
51 11]. To achieve “chemical accuracy”, improvements are required to the computational model of the protein-  
52 ligand system (the force field) while constraining any increase in computational cost to ensure results can  
53 be produced on a timescale viable for active drug discovery projects, as alchemical free energy calculations  
54 typically require generating tens to hundreds of nanoseconds of simulation data within a few hours [5, 12].

55 Surpassing 1 kcal mol<sup>-1</sup> accuracy requires model improvements that are difficult to generalize  
56 Relative free energy methods almost universally utilize fixed-charge MM force fields to model small, organic,  
57 drug-like molecules and interactions with their respective receptors and aqueous environments, such as  
58 GAFF [13, 14], CGenFF [15, 16, 16], or OPLS [17]. Importantly, these popular class I [18, 19] MM force fields  
59 have well-characterized drawbacks, in part, because they omit a number of important energetic contribu-  
60 tions known to limit their ability to achieve chemical accuracy [7, 20, 21]. For example, while moving to more  
61 complex electrostatics models which include fixed multipoles and polarizable dipoles [22] are promising, the  
62 development of polarizable force fields that broadly deliver accuracy gains has proven challenging [23–25].

63 Deficiencies in the modeling of torsions that accurately account for local chemical environment is also a  
64 difficult challenge for MM force fields [26]. Indeed, many MM force fields recommend refitting torsion po-  
65 tentials directly to quantum chemical calculations for individual molecules in a bespoke manner, a process  
66 considered essential to achieving a 1–2 kcal mol<sup>-1</sup> level of accuracy in binding free energy calculations [1, 27].  
67 Even so, the environment-dependent coupling between torsions and other valence degrees of freedom  
68 [7, 20, 21, 28] (including adjacent torsions [26, 29–32]) makes it difficult for this simple refitting approach to  
69 accurately capture often significant ligand conformational reorganization effects [33].

70 QM/MM offers a parameterization-free alternative, but at significantly increased cost

71 Another approach attempts to avoid the parameterization issue altogether by modeling the ligand using  
72 QM levels of theory, while treating the remaining atomic environment with an MM force field in a hybrid  
73 QM/MM potential [34–38]. QM/MM calculations are orders of magnitude more expensive than the equiva-  
74 lent calculation at the MM level, which has led to attempts to speed up these calculations by either using a  
75 low level of QM theory, or reducing the number of QM-level evaluations that are performed. QM/MM simu-  
76 lations for ligand binding are yet limited in accuracy due to the low level of QM theory (often semi-empirical  
77 or DFT with limited basis sets) that are computationally practical. This has driven the development of meth-  
78 ods that attempt to minimize the amount of QM/MM simulation data that must be generated by computing  
79 perturbative corrections to MM alchemical free energy calculations [39–41].

80 Machine learning (ML) potentials can reproduce QM energies at greatly reduced cost

81 Recently, quantum machine learning potentials (ML or QML) [42]—such as those based on neural networks  
82 like ANI [43]—have seen success in reproducing QM energetics with orders of magnitude less computational  
83 cost than the QM methods they aim to reproduce. The ANI-1x neural network potential [43], for example, is  
84 able to reproduce DFT-level energies ( $\omega$ B97X functional with 6-31G\* basis set) with a 10<sup>6</sup> speed up. Indeed,  
85 the ANI models are so fast and reproduce quantum chemical data so well that recent approaches have  
86 integrated them into bespoke torsion refitting schemes as an alternative to costly QM torsion scans [44].  
87 Notably, the recently-developed ANI-2x supports molecular systems including element types C, H, N, O,  
88 as well as F, Cl, and S—ideal for applications to receptor-ligand systems as they cover 90% of drug-like  
89 molecules. In particular, for the purpose of this study, ANI-2x covers 100% of the ligands included in the  
90 Schrödinger benchmark set for alchemical free energy calculations [45].

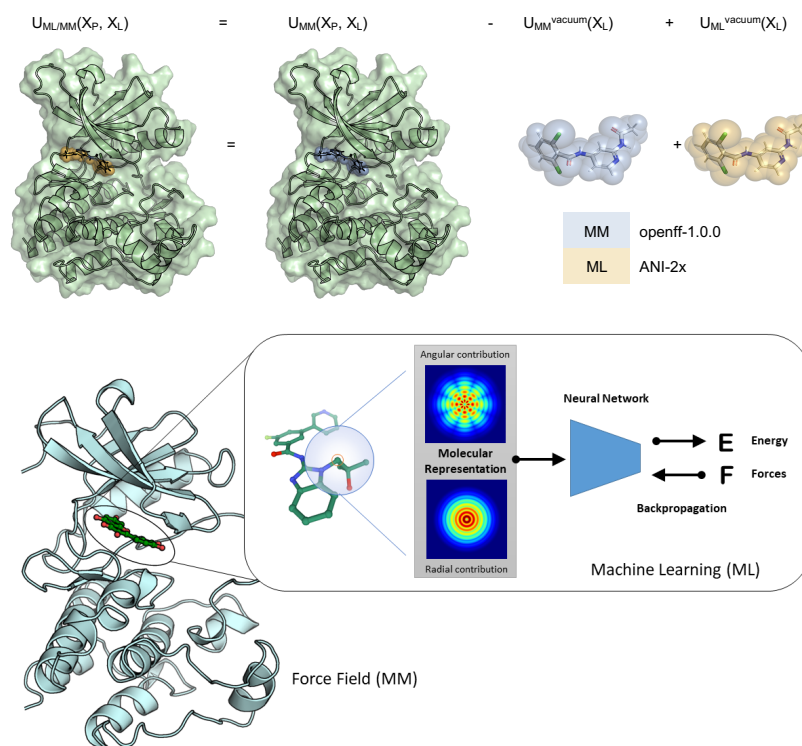

**Figure 1. A hybrid ML/MM potential can treat intramolecular ligand forces with high accuracy. ML potentials can treat intramolecular ligand forces with high accuracy, as part of a hybrid ML/MM scheme.** *Top:* We can construct a hybrid machine learning / molecular mechanics (ML/MM) potential that treats ligand intramolecular interactions with higher accuracy than achievable by MM potentials by subtracting the MM energy of the ligand in vacuum and adding the more accurate ML energy of the ligand in vacuum. Here, the MM model uses the Open Force Field Initiative [<http://openforcefield.org>] OpenFF 1.0.0 (“Parsley”) small molecule force field [46], AMBER14SB [47], and TIP3P [48] while the ML model uses the ANI-2x [49] neural network potential parameterized using DFT  $\omega$ B97X/6-31G\* QM calculations. *Bottom:* The ANI-2x [49] ML potential first computes radial and angular features for each atom and then sums energetic contributions by atom using deep learning models specific to each element-element pair.

## 91 Hybrid ML/MM potentials provide improved ligand energetics

92 While the notion of simulating an entire solvated protein-ligand system with quantum chemical accuracy—  
 93 in a manner that avoids molecular mechanics parameterization altogether—with orders of magnitude less  
 94 effort is immediately appealing, several limitations stand in the way to this: First, the number of elements  
 95 covered by potentials like ANI [49] are so far rather limited, precluding their application to ions and cofactors;  
 96 Second, while ML models are orders of magnitude faster than any reasonable QM levels of theory, they  
 97 are currently still orders of magnitude slower than GPU-accelerated MM simulations, though this gap is  
 98 expected to close rapidly with both software and hardware improvements. Third, ML models have not yet  
 99 been parameterized on systems that would ensure well-behaved condensed-phase properties, so that MM  
 100 may yet provide superior results for treating intermolecular interactions in large, extended systems.

101 However, hybrid ML/MM models—wherein ligand interactions are treated with ML and the environment  
 102 and ligand-environment interactions with MM (in analogy to QM/MM [34–38])—could provide a convenient  
 103 and efficient path to improving accuracy by capturing complex molecular interactions that classical force  
 104 fields fail to do. Recently, Lahey et. al. [52] demonstrated that by using the ANI-1ccx [53] ML potential  
 105 (a variant of ANI-1x refit to coupled-cluster calculations) to represent intramolecular interactions of small  
 106 molecule ligands, accurate binding poses and conformational energies could be afforded to the EGFR in-  
 107 hibitor, erlotinib. Notably, they reported significant discrepancies among torsional energy profiles between  
 108 the MM and ANI-1ccx potentials [52].

109 Here, we wondered whether incorporating this higher-accuracy ML treatment of small molecule ligand

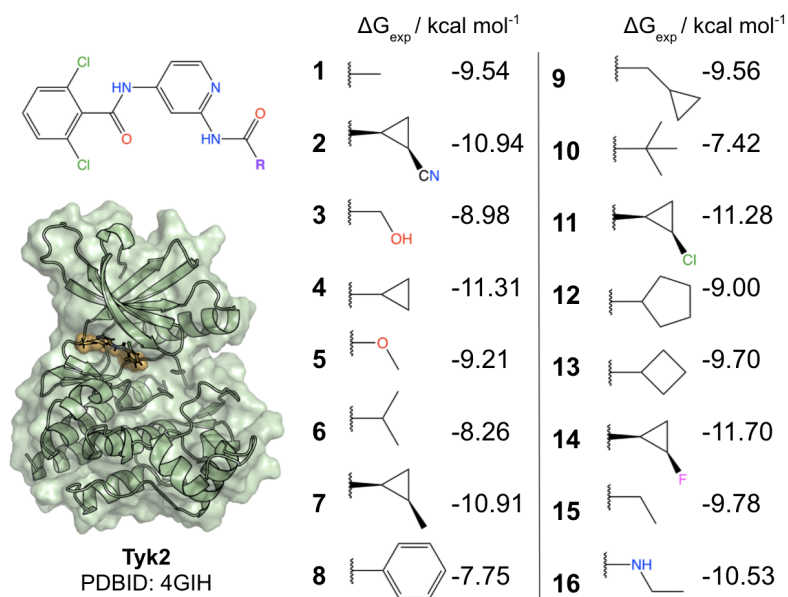

**Figure 2. Tyk2 is a challenging test set for predicting kinase:inhibitor binding free energies.** The Tyk2 congeneric ligand benchmark series was taken from the Schrödinger JACS benchmark set [45], which is challenging for both commercial force fields (OPLS2.1 achieves a  $\Delta G$  RMSE of  $0.93 \pm 0.12$  kcal mol<sup>-1</sup> [45]) and public force fields (GAFF 1.8 achieves a  $\Delta G$  RMSE of 1.13 kcal mol<sup>-1</sup>, and  $\Delta \Delta G$  RMSE of 1.27 kcal mol<sup>-1</sup> [50]). *Left:* Illustration of the X-ray structure used for all calculations. *Right:* 2D structures of all ligands in the benchmark set, showing common scaffold and substituents. The Schrödinger Tyk2 benchmark set contains a congeneric series selected from [51, 51] where experimental errors in  $K_i$  are reported to have  $\delta K_i / K_i < 0.3$ , yielding  $\delta \Delta G \approx 0.18$  kcal mol<sup>-1</sup> and  $\delta \Delta \Delta G \approx 0.25$  kcal mol<sup>-1</sup>.

110 intramolecular energetics within an MM scheme would lead to quantitative improvements in absolute and  
 111 relative binding free energies. A particularly convenient hybrid ML/MM formulation corresponds to the  
 112 functional form given in Equation 1 (and visualized in Figure 1) wherein the potential energy function for a  
 113 environment (receptor and/or solvent)/ligand system takes the form

$$U_{\text{ML/MM}}(X_p, X_L) = U_{\text{MM}}(X_p, X_L) - U_{\text{MM}}^{\text{vacuum}}(X_L) + U_{\text{ML}}^{\text{vacuum}}(X_L) \quad (1)$$

114 with  $X_p \in \mathbb{R}^{3N_p}$  as all non-ligand coordinates (receptor and/or solvent),  $X_L \in \mathbb{R}^{3N_L}$  as the ligand coordinates,  
 115  $U_{\text{MM}}^{\text{vacuum}}(X_L)$  and  $U_{\text{ML}}^{\text{vacuum}}(X_L)$  indicating the MM/ML potential energy function for the ligand and  $U_{\text{MM}}(X_p,$   
 116  $X_L)$  the MM potential energy function for the environment/ligand system. The formulation given in Equa-  
 117 tion 1 treats intramolecular ligand interactions with an ML potential while intermolecular and environmen-  
 118 tal (receptor and/or solvent) atomic interactions are treated with MM force fields [52]. Although other  
 119 formulations are possible—such as including short-range ligand-environment interactions within the ML  
 120 region—we will demonstrate that the simple formulation of Equation 1 is sufficient to realize significant im-  
 121 provements in the accuracy of computed binding free energies for a challenging kinase:inhibitor benchmark  
 122 system (Figure 2).

### 123 Nonequilibrium perturbations can efficiently compute MM to ML/MM corrections

124 Current implementations of ML potentials do not permit an entire alchemical free energy calculation to be  
 125 carried out with hybrid ML/MM potentials in a practical timescale. Instead, we aim for an approach that post-  
 126 processes traditional MM alchemical free energy calculations [5, 12, 58]—such as the relative free energy  
 127 calculation used here—to compute a correction  $\Delta G^{\text{MM} \rightarrow \text{ML/MM}}$  to the free energy of binding. Alchemical free  
 128 energy calculations are now both routine and efficient, and available in a wide variety of software packages,  
 129 often with GPU acceleration [6, 45, 50, 59–65].

130 While it may be tempting to simply sample from equilibrium MM states where the ligand is in complex or  
 131 solution and estimate  $\Delta G^{\text{MM} \rightarrow \text{ML/MM}}$  based on the instantaneous dimensionless work  $w[X] \equiv \beta[U_{\text{ML/MM}}(X) -$

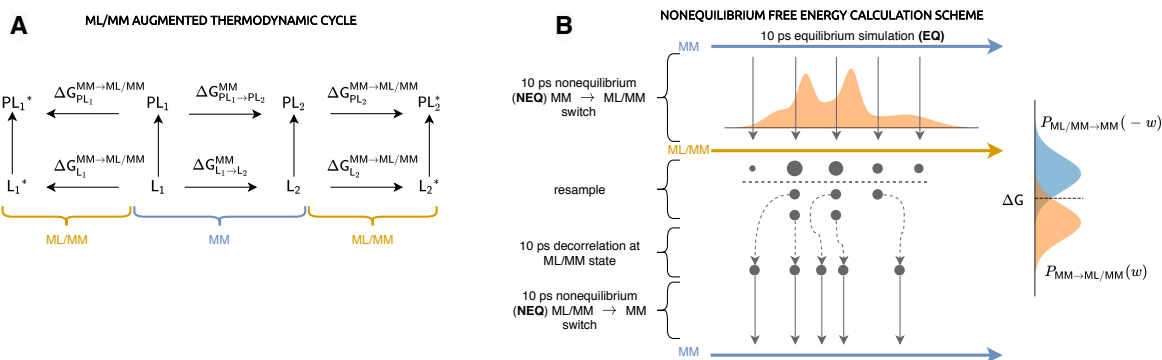

**Figure 3. A simple nonequilibrium switching scheme can efficiently correct standard MM alchemical free energy calculations to ML/MM accuracy.** (A) Augmented thermodynamic cycle used to estimate ML/MM free energies. The blue-bracketed, four-state thermodynamic cycle represents a typical MM relative free energy calculation where  $\Delta\Delta G_{MM} = \Delta G_{MM}^{L_1 \rightarrow L_2} - \Delta G_{MM}^{PL_1 \rightarrow PL_2}$ . The orange bracketed thermodynamic augmentations represent respective ML/MM hybrid states such that  $\Delta\Delta G_{ML/MM} = \Delta\Delta G_{MM} + \Delta G_{PL_1}^{ML/MM} - \Delta G_{PL_2}^{ML/MM} + \Delta G_{L_2}^{ML/MM} - \Delta G_{L_1}^{ML/MM}$ . (B) Illustration of the nonequilibrium switching perturbation approach to estimating free energy corrections. The blue MM and orange ML/MM arrows represent equilibria at respective thermodynamic states. First,  $N$  configurations are sampled from equilibrium at the MM state and short MM $\rightarrow$ ML/MM nonequilibrium (NEQ) trajectories are generated and the dimensionless work  $w_{MM \rightarrow ML/MM}$  recorded. Subsequently, the last configuration of each NEQ trajectory is resampled (with replacement) with probability proportional to  $e^{-w_{MM \rightarrow ML/MM}}$ . Resampled configurations are decorrelated with 10 ps of ML/MM equilibrium molecular dynamics before backward ML/MM $\rightarrow$ MM nonequilibrium trajectories are generated and the corresponding dimensionless work ( $w_i^{ML/MM \rightarrow MM}$ ) stored. The Bennett acceptance ratio (BAR) [54–56] is used to estimate the free energy difference, which corresponds to the crossing of the true  $p(w_{MM \rightarrow ML/MM})$  and  $p(-w_{ML/MM \rightarrow MM})$  work distributions [55, 57].

132  $U_{MM}(X)$ , unless the MM models have been specifically parameterized to minimize the variance in  $w$  [41],  
 133 small differences in the equilibrium valence degrees of freedom ensure that the variance of this weight is  
 134 so large as to make this approach impractical (Figure 4).

135 As an alternative, we propose a convenient approach that uses short, nonequilibrium (NEQ) simulations  
 136 to reduce the variance sufficiently to enable practical free energy estimates. Importantly, we aim to avoid  
 137 two pitfalls: First, we aim to avoid the significant bias that arises in attempting to estimate free energy  
 138 differences from short, unidirectional MM $\rightarrow$ ML/MM nonequilibrium switching trajectories [66], as well as  
 139 the costly long nonequilibrium trajectories that would be required to minimize that bias; instead, we aim  
 140 to use bidirectional protocols (MM $\rightarrow$ ML/MM and ML/MM $\rightarrow$ MM) and the optimal Bennett acceptance ratio  
 141 estimator, which minimizes this bias [54, 55, 66]. Second, we aim to minimize the amount of simulation  
 142 data that must be generated from the ML/MM state since it is so slow to sample from.

143 We construct an alchemical protocol that connects the easily-sampled MM thermodynamic states to the  
 144 ML/MM thermodynamic states (in solvent and complex) via a linear interpolation of the potential (geometric  
 145 interpolation of the sampled probability density function [67]) wherein the potential takes the form

$$U_{ML/MM}(X_p, X_L | \lambda) = U_{MM}(X_p, X_L) - \lambda U_{MM}^{\text{vacuum}}(X_L) + \lambda U_{ML}^{\text{vacuum}}(X_L). \quad (2)$$

146 Here, the alchemical parameter  $\lambda \in [0, 1]$  interpolates between the MM and hybrid ML/MM endstates,  $X_p \in$   
 147  $\mathbb{R}^{3N_p}$  corresponds to the configuration of the receptor (and all other environment) atoms, and  $X_L \in \mathbb{R}^{3N_L}$   
 148 corresponds to the configuration of the ligand atoms. The NEQ free energy correction can be computed  
 149 using four sequential steps, each performed independently for the solvated phase and the complex phase:

- 150 1. Extract  $N$  *iid* equilibrium samples from each MM thermodynamic state (ligand in complex or sol-  
 151 vent) and perform MM $\rightarrow$ ML/MM nonequilibrium switching (NEQ) simulations for a fixed trajectory  
 152 length  $T$  using the alchemical potential Eq. 2 with  $\lambda = t/T$ , recording the dimensionless protocol work  
 153  $w_{MM \rightarrow ML/MM}$  [68].
- 154 2. Resample the final snapshots from each trajectory (with replacement) using the weight  $e^{-w_{MM \rightarrow ML/MM}}$  to  
 155 generate an ensemble of  $N$  snapshots sampled from equilibrium for the ML/MM state.



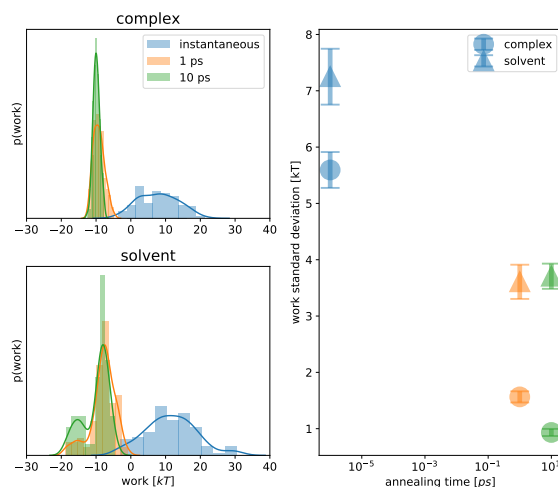

**Figure 4. Short 10 ps nonequilibrium trajectories are sufficient to reliably estimate MM→ML/MM free energy corrections.** *Left:* Forward nonequilibrium work distribution (MM→ML/MM) for each of three switching times for both complex and solvated ligand phases for a representative ligand (**1**). The evolution of the work distributions demonstrates a reduction in variance and converge to more negative work values upon longer annealing time [69]. *Right:* Standard deviations of work distributions with respect to nonequilibrium protocol length for complex and solvent phases and bootstrapped 68% CIs. The complex phase has consistently lower work standard deviations, likely due to comparatively lower ligand entropy than in the solvent phase.

- 156 3. For each resampled configuration, perform a short (10 ps) MD simulation with the ML/MM potential
- 157 to decorrelate the resampled configurations.
- 158 4. For each of these ML/MM configurations, perform NEQ switching with the time-reversed protocol
- 159 (ML/MM→MM) and record the dimensionless work  $w_{\text{ML/MM} \rightarrow \text{MM}}$ .

160 The Bennett acceptance ratio (BAR) [54–56] is then used to estimate the free energy correction  $\Delta G^{\text{MM} \rightarrow \text{ML/MM}}$

161 to the absolute free energy of the MM endstate for each phase (complex, solvent) of the alchemical free

162 energy calculation.

163 We stress that resampling after forward NEQ switching (step 2) is a critically important part of the proce-

164 dure. Once forward NEQ trajectories are collected, each final configuration is approximately Boltzmann dis-

165 tributed with respect to the ML/MM thermodynamic state as  $\pi_{\text{ML/MM}}(x_i) \approx e^{-\text{work}_i}$  [70]. Omitting the resam-

166 pling step and simply retaining all of the conformations generated by the forward NEQ switch step would

167 not recover an approximately Boltzmann-distributed sample size. Omitting the resampling step would be

168 particularly problematic in the solvent phase—where the forward work distributions generally span several

169  $k_B T$  (see Fig. S.I.1)—since ligand conformations that are exponentially disfavored at the ML/MM state (com-

170 pared to the MM state) would undergo backward NEQ switching, rendering prohibitively biased backward

171 work distribution and free energy estimates. The resampling step is followed by a short equilibration (step 3)

172 to decorrelate configurations that are resampled multiple times and recover from any collapse in effective

173 sample size that occurred during the resampling step.

174 An analysis of the unidirectional work distribution for several nonequilibrium protocol lengths (some-

175 times referred to as "annealing times" in the annealed importance sampling (AIS) literature [71]) suggests

176 that 10 ps switching times are sufficient to produce useful free energy estimates (Figure 4). Indeed, per-

177 forming the bidirectional switching scheme for several ligands confirms that the forward and backward

178 work distributions overlap and BAR can produce useful estimates of the free energy corrections (Figure 5).

179 Notably, solvent phase NEQ perturbations consistently yield higher work variances (Figure S.I.1) in their

180 work distributions than their complex-phase counterparts, presumably indicative of the conformationally

181 constrained nature of bound (but not solvated) ligands.

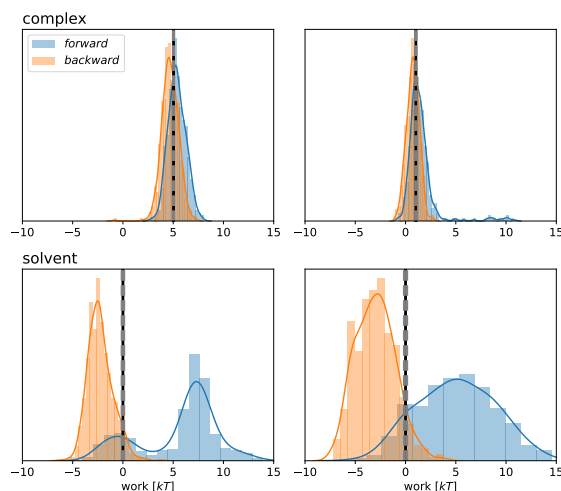

**Figure 5. Bidirectional work distributions from nonequilibrium switching show sufficient overlap to compute precise free energy corrections from MM to ML/MM in both solvent and complex phases.** Forward (blue) and backward (orange) work distributions from 10 ps nonequilibrium switching trajectories for MM to ML/MM perturbations are shown for complex (top) and solvent (bottom) phases for ligands 1 (left) and 14 (right). The Bennett acceptance ratio (BAR) estimates of the free energies and the uncertainty thereof are shown as vertical black lines and vertical gray dotted lines, respectively.

## 182 ML/MM significantly improves accuracy on a kinase:inhibitor benchmark

183 We applied this nonequilibrium switching free energy correction scheme to a benchmark set of a well-  
184 studied congeneric series of inhibitors for non-receptor tyrosine-protein kinase (Tyk2) from the Schrödinger  
185 JACS benchmark set (Figure 2) [45]. This benchmark set is challenging for both commercial force fields  
186 (OPLS2.1 achieves a  $\Delta G$  RMSE of  $0.93 \pm 0.12$  kcal mol<sup>-1</sup> [45]) and public force fields (GAFF 1.8 achieves a  $\Delta G$   
187 RMSE 1.13 kcal/mol<sup>-1</sup> and  $\Delta\Delta G$  RMSE of 1.27 kcal/mol [50]). We consider a purely MM binding free energy  
188 baseline by using the ANI-2x [49] ML model (parameterized from DFT  $\omega$ B97X/6-31G\*) with AMBER14SB [47],  
189 TIP3P [48], and the Open Force Field Initiative OpenFF 1.0.0 ("Parsley") small molecule force field [46].

190 The OpenFF 1.0.0 ("Parsley") MM free energy calculations, shown in Figure 6 (A) and (C), achieve an  
191 accuracy that is statistically indistinguishable from other public and commercial MM force field benchmarks  
192 in terms of both root-mean squared error (RMSE; OPLS2.1 [45] and GAFF 1.8 [50]) and mean unsigned error  
193 (MUE; OPLS3.1, GAFF 2.1, and CGenFF 4.1 [64]). When the MM free energy calculation is corrected to ML/MM  
194 level of theory, Figure 6 (B) and (D), we recover experimental free energies with an RMSE of 0.47 [95%  
195 CI: 0.30, 0.67] kcal mol<sup>-1</sup>, a large and statistically significant improvement from MM (RMSE 0.97 [95% CI:  
196 0.70, 1.22] kcal mol<sup>-1</sup>). Due to the naïve formulation of the ML/MM potential, this improvement in the  
197 experimental agreement can only be a consequence of an improved intramolecular potential for the ligands  
198 in this system. The particular formulation was chosen as it allows for rapid calculation of the per-ligand  
199 corrections to be performed *post hoc*. More advanced definitions of the ML/MM potential may lead to  
200 further improvements, by modelling additional interactions with higher levels of theory, however this would  
201 require concerted efforts to implement efficient interoperability between MM and ML packages—an area  
202 that requires further work.

203 The nature of these corrections is somewhat surprising: All MM→ML/MM corrections are positive, dis-  
204 favorin binding. There is a notable trend in the magnitude of the correction, as illustrated by Figure 7. The  
205 smallest  $\Delta G^{\text{MM} \rightarrow \text{ML/MM}}$  corrections, on the order of 0.5–1.5 kcal mol<sup>-1</sup> are the conformationally-strained cy-  
206 clopropane moieties. Aliphatic groups with more conformational degrees of freedom, such as larger rings  
207 and acyclic groups, show larger corrections, with some of the largest MM→ML/MM corrections contain-  
208 ing functional groups that will conjugate with the amide group. The subtleties of the electronics of these  
209 conjugated molecules are unlikely to be captured by MM forcefields, particularly small molecule torsion  
210 parameters [26].

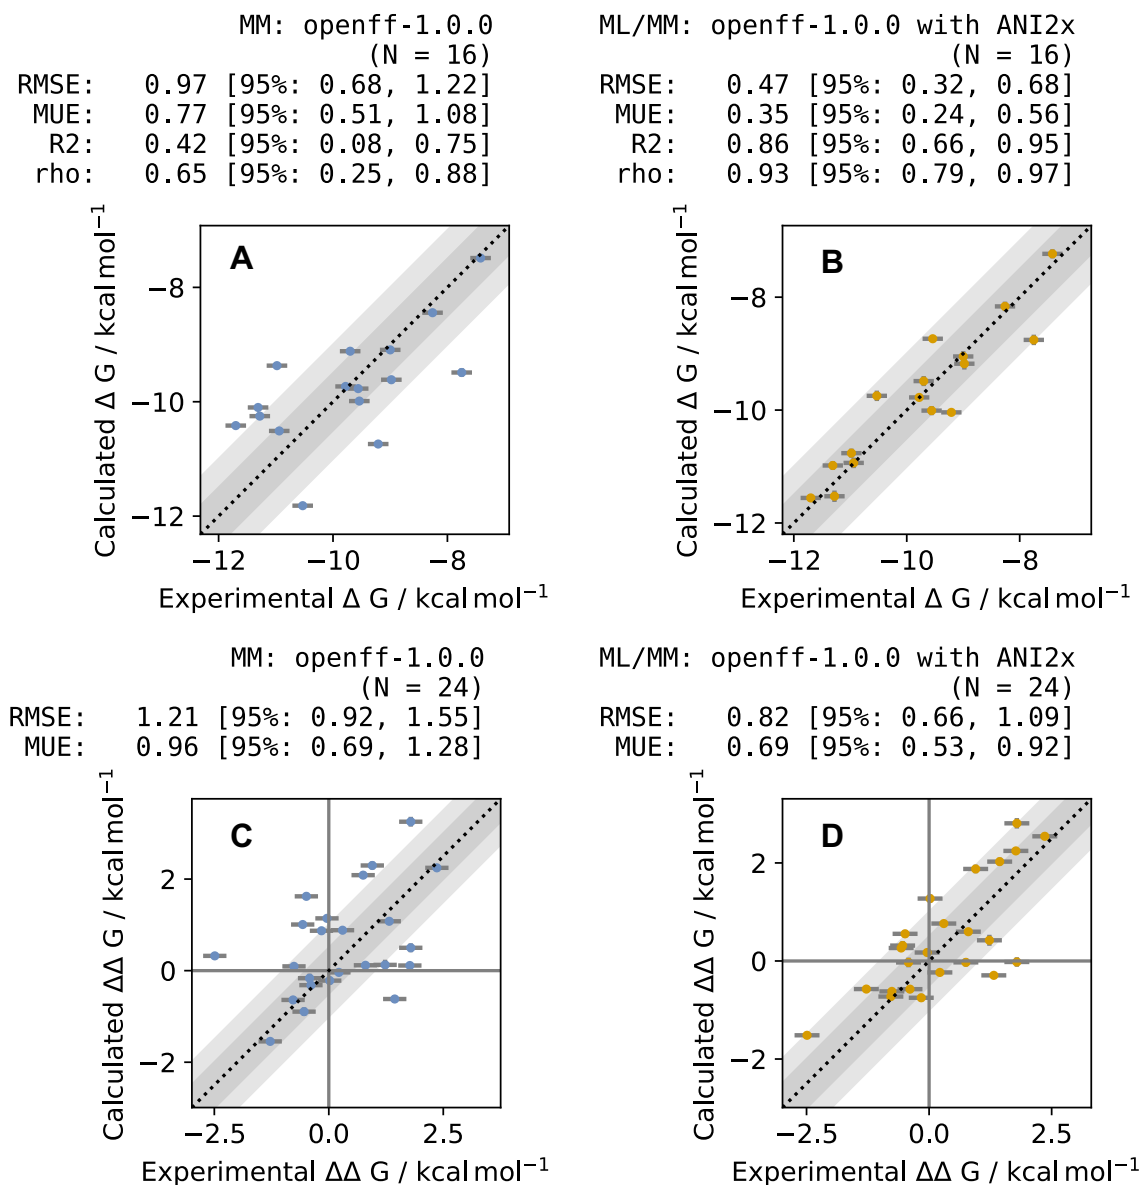

**Figure 6. ML/MM free energy calculations show significant improvement over MM in reproducing absolute and relative Tyk2 inhibitor binding free energies.** (A) Absolute binding free energies for the MM small molecule OpenFF 1.0.0 (“Parsley”) force field used with AMBER14SB and TIP3P water computed from relative free energy calculations estimated using perses 0.7.1 [<http://github.com/choderalab/perses>] and the maximum-likelihood estimator [72] to integrate estimates from redundant transformations in the relative alchemical transformation network. The same redundant network of relative alchemical transformations used in [45] was used here. (B) Absolute free energies ( $\Delta G$ ) corrected to ML/MM (using ANI-2x [49] for the ML model) using the nonequilibrium correction scheme depicted in Figure 3. (C) Relative MM binding free energies ( $\Delta\Delta G$ ) for computed relative free energy transformation edges, with correction using MLE. (D) Relative ML/MM binding free energies obtained from differences in the corrected absolute binding free energy estimates (top right). Blue scatter points are MM results, and orange are ML/MM results. Dark and light grey shaded regions indicate the region of  $\pm 0.5$  and  $\pm 1.0$  kcal mol<sup>-1</sup> error respectively. Vertical error bars (which appear smaller than the symbols) show one standard deviation in the free energy, calculated by MBAR, while the experimental error bar of 0.18 kcal mol<sup>-1</sup> is used [51]. Statistical analysis was performed using the Arsenic package [<http://github.com/openforcefield/arsenic>], with 95% confidence intervals calculated by bootstrap analysis. For all plots, an additive constant was added to all computed values, such that the mean computed value is equal to the mean experimental value, such as to minimise the RMSE as in [45].



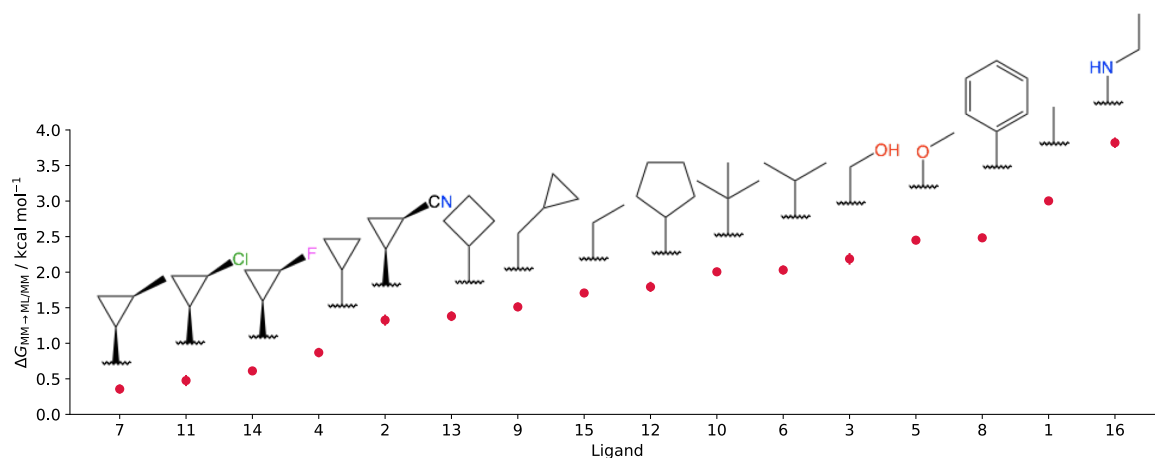

**Figure 7. ML/MM corrections to MM binding free energies can be up to 4 kcal mol<sup>-1</sup> in magnitude.** The signed  $\Delta G^{\text{MM} \rightarrow \text{ML/MM}}$  corrections for each ligand (with R-group shown) are shown, ordered from least positive (slightly disfavoring binding) to most positive (strongly disfavoring binding).

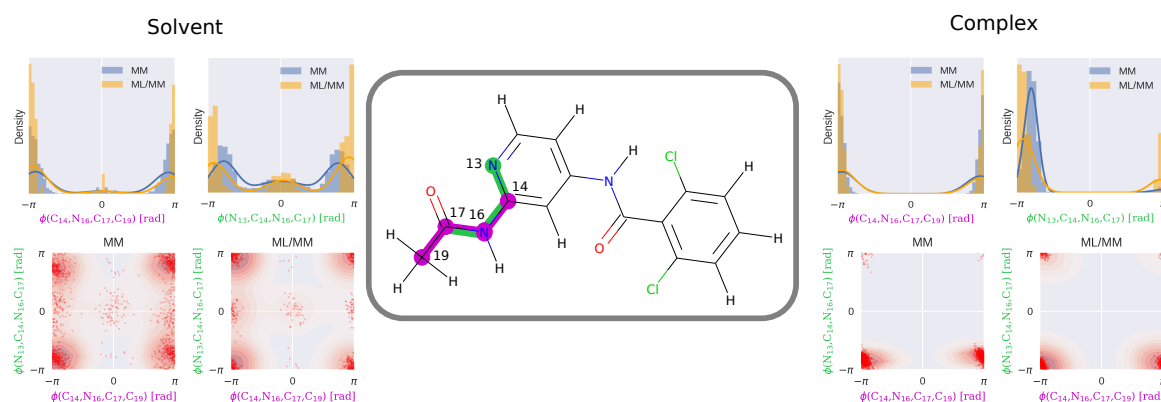

**Figure 8. Torsion profiles and couplings differ between MM and hybrid ML/MM models** 1D and 2D torsion profiles of coupled amide torsions connecting the substituent R-group for ligand **1** (center) are shown. *Top row:* 1D torsion profiles for bonds highlighted purple and green for MM (blue) and MM/ML (orange) solvent and for complex. *Bottom row:* 2D torsion-torsion profiles for both solvent and complex are shown for both MM and ML/MM ensembles using a bivariate kernel density estimate, with red scatter points indicating observed samples.

## Improved torsion energetics appear to drive accuracy improvements

It is well-appreciated that general small molecule MM force fields often fail to accurately describe torsion energy profiles observed with higher-level quantum chemical calculations [73, 74], a phenomenon driven by the significant effect substituents can have on torsion profiles via electronic effects [26, 75]. To overcome this limitation, many MM force fields recommend refitting torsion potentials directly to quantum chemical calculations for individual molecules in a bespoke manner [1, 27].

It is plausible that the improved accuracy demonstrated by ML/MM in Figure 6 arises primarily from improved modeling of torsion energetics or torsion-torsion coupling. To investigate this, we examined the torsion probability density functions for conformations sampled by the ligand in solvent and in complex. Figure 8 depicts the 1D torsion (top) and 2D torsion-torsion (bottom) probability density functions for ligand **1**, focusing on the torsions associated with the amide linker to the substituted R-groups in the ligand series. The ML/MM potential samples a notably more peaked distribution with significantly perturbed equilibrium rotamer probabilities in solvent, and a tighter shifted torsion range in complex (Figure 8, top). 2D couplings are also surprisingly different between MM and ML/MM in complex.

## 225 Discussion

226 In this work, we demonstrated that a hybrid ML/MM model of a challenging, pharmaceutically-relevant  
227 benchmark receptor:ligand system dramatically outperforms the both commercially and publicly-available  
228 MM force fields in its ability to recover experimental binding free energies of a congeneric series of inhibitors.  
229 The ability to halve the current state-of-the-art free energy uncertainty to  $\sim 0.5$  kcal mol<sup>-1</sup> using a simple post-  
230 processing procedure along with publicly-available software and ML models is promising. In particular, it  
231 suggests that there is significant potential yet to predict ligand:target binding affinities for prospective drug  
232 design campaigns.

233 The NEQ protocol suggests the potential for further efficiency improvements.

234 Among the insights made in the course of this study, we make special note of the NEQ procedure and  
235 its prospect for optimization. It is clear from Figures 4, 5, and the Supporting Information that a fixed-  
236 length NEQ protocol may indeed be wasteful in the complex phase considering the consistency of high work  
237 distribution overlap and BAR precision; in fact, exponential averaging results for all of the forward complex  
238 phase NEQ protocols yield free energies within 0.1 kcal mol<sup>-1</sup> of the calculated BAR free energy correction.  
239 Indeed, reallocating the effort of conducting an ML/MM equilibration and backward protocol from complex  
240 to the solvent NEQ protocol might afford a more robust, lower variance free energy correction.

241 ML/MM and MM torsion distribution discrepancies prompt further investigation.

242 The substantial differences between torsion profiles from the ML/MM and MM models in Fig. 8 suggests  
243 that the significant free energy corrections afforded by the ML/MM model may be largely a consequence  
244 of poorly parameterized torsions in the MM model, or perhaps the existence of nonnegligible torsion  
245 couplings. Further experiments could distinguish between these scenarios by refitting torsion profiles or  
246 reweighting using only 1D or 2D torsion profiles rather than using the complete replacement of ligand in-  
247 tramolecular energetics as was considered here.

248 The fact that the most pronounced discrepancies in torsion profiles for both solvent and complex phases  
249 were observed about amide functional groups is particularly notable. If it is indeed the case that current  
250 MM force fields fail to recover appropriate conformational energetics of amides, then there is certainly a  
251 potential for free energy accuracy improvement in a large subset of druglike molecules, especially among  
252 protease inhibitors, which are characterized by several amide groups to mimic peptide backbones.

253 Binding free energy improvements afforded by ML/MM show promise for other systems.

254 In this study, we were fortuitous in that the OpenFF 1.0.0 provided heavy-tailed phase-space distributions,  
255 particular in the solvent phase (see Figure 8), that overlapped sufficiently with the ML/MM model. Had this  
256 not been the case, it is likely that the NEQ correction procedure would have failed to recover free energies  
257 with sufficient precision at the annealing times employed in this study. Further study will indicate whether  
258 other MM force fields—including the GAFF force field [13, 14] and more recent iterations of the OpenFF  
259 force fields—generally provide sufficient phase-space overlap with ML models for ML/MM corrections to  
260 remain computationally convenient and accurate with respect to experiment.

261 While these results illustrate the notable improvement to relative free energy calculations for this Tyk2  
262 protein:ligand system, more extensive studies will be needed to determine how robustly this accuracy im-  
263 provement manifests for a broad range of congeneric series. While the current implementation involves  
264 post-processing of pre-generated MM data, the implementation of the method could be improved by inte-  
265 grating ML potential models such as ANI into extensible simulation packages such as OpenMM [76], perhaps  
266 via a plugin architecture. Improved interoperability would increase ease of adoption for computational ef-  
267 forts in drug design projects. The definition of the hybrid ML/MM potential could be improved through  
268 expanding the terms in the system that are computed with ML by using ML methods such as AIMNet [77],  
269 SchNet [78], PhysNet [79], or AP-Net [80] that allow for decomposition of electrostatics and long-range dis-  
270 persion from short-term valence energies.

271 Machine learning will likely permeate all aspects of alchemical free energy calculations.  
272 More broadly, machine learning will play various roles in all aspects of alchemical free energy calculations.  
273 As more calculations are performed, machine learning models (such as graph convolutional or message  
274 passing networks [81]) will undoubtedly be used to learn the *difficulty* (statistical efficiency) of relative trans-  
275 formations in a manner that can be used to design optimal transformation networks [72] or optimal al-  
276 chemical protocols. Scheen et al. [82] recently demonstrated how ligand-based ML models can be used  
277 to correct MM alchemical free energy calculations based on experimental training data, applying it to hy-  
278 dration free energy computation. Ghanakota et al. [83] also demonstrated how ligand-based ML models  
279 could be trained to learn more expensive free energy calculations to permit evaluation of large compound  
280 spaces with free energy accuracy. These few applications are just the beginning of how machine learning  
281 will transform physical modeling in the biosciences.

## 282 Code and data availability

- 283 • Input files and setup scripts: <https://github.com/choderalab/qmlify>

## 284 Author Contributions

285 Conceptualization: JDC, DAR, HEBM, JF, and MW; Methodology: JDC, HBM, DAR, JF, and MW; Software: PBG,  
286 DAR, HBM, JF, and MW; Investigation: DAR, HEBM, JF, and MW; Writing–Original Draft: DAR, JDC, HBM, JF,  
287 and MW; Writing–Review&Editing: AER, OI and JDC; Funding Acquisition: JDC; Resources: JDC; Supervision:  
288 JDC, AER, and OI.

## 289 Acknowledgments

290 DAR acknowledges support from the Tri-Institutaional PhD Program in Chemical Biology and the Sloan Ket-  
291 tering Institute. HEBM acknowledges support from a Molecular Sciences Software Institute Investment Fel-  
292 lowship and Relay Therapeutics. JF acknowledges support from NSF CHE-1738979 and the Sloan Kettering  
293 Institute. MW acknowledges support from a FWF Erwin Schrödinger Postdoctoral Fellowship J 4245-N28. JDC  
294 acknowledges support from NIH grant P30 CA008748, NIH grant R01 GM121505, NIH grant R01 GM132386,  
295 and the Sloan Kettering Institute. OI acknowledges support from NSF CHE-1802789 and Carnegie Mellon  
296 University. AER acknowledges support from NSF CHE-1802831

297 The authors thank Christopher Rowley (ORCID: [0000-0002-0205-952X](https://orcid.org/0000-0002-0205-952X)) for sharing early work and dis-  
298 cussions that inspired this study; Christopher I. Bayly (ORCID: [0000-0001-9145-6457](https://orcid.org/0000-0001-9145-6457)) and David L. Mob-  
299 ley (ORCID: [0000-0002-1083-5533](https://orcid.org/0000-0002-1083-5533)) for sharing insights on nonequilibrium free energy calculations; Gianni  
300 de Fabritiis (ORCID: [0000-0003-3913-4877](https://orcid.org/0000-0003-3913-4877)) for discussions and inspirational work in motivating the utility  
301 of hybrid ML/MM models; Peter K. Eastman (ORCID: [0000-0002-9566-9684](https://orcid.org/0000-0002-9566-9684)) for providing extensive sup-  
302 port for OpenMM and implementing numerous features of use in this work; and the scientists and soft-  
303 ware scientists from the Open Force Field Initiative [<http://openforcefield.org/members>] and Consortium [<http://openforcefield.org/consortium>]  
304 for their contributions to both the science behind OpenFF 1.0.0 and the highly  
305 usable software infrastructure that made this work possible.

306 The authors are extremely grateful to OpenEye Scientific for granting an academic license for use of the  
307 OpenEye Toolkit for this work.

## 308 Disclosures

309 JDC is a current member of the Scientific Advisory Board of OpenEye Scientific Software and a consultant  
310 to Foresite Laboratories. The Chodera laboratory receives or has received funding from multiple sources,  
311 including the National Institutes of Health, the National Science Foundation, the Parker Institute for Cancer  
312 Immunotherapy, Relay Therapeutics, Entasis Therapeutics, Silicon Therapeutics, EMD Serono (Merck KGaA),  
313 AstraZeneca, Vir Biotechnology, Bayer, XtalPi, the Molecular Sciences Software Institute, the Starr Cancer  
314 Consortium, the Open Force Field Consortium, Cycle for Survival, a Louis V. Gerstner Young Investigator  
315 Award, and the Sloan Kettering Institute. A complete funding history for the Chodera lab can be found at  
316 <http://choderalab.org/funding>

317 AER is a current member of the Science Advisory Board of Schrödinger Co. and receives funding from  
318 Genentech Co.

## References

- [1] **Abel R**, Wang L, Harder ED, Berne B, Friesner RA. Advancing drug discovery through enhanced free energy calculations. *Accounts of chemical research*. 2017; 50(7):1625–1632.
- [2] **Wang L**, Chambers J, Abel R. Protein–Ligand Binding Free Energy Calculations with FEP+. In: *Biomolecular Simulations* Springer; 2019.p. 201–232.
- [3] **Schindler C**, Baumann H, Blum A, Böse D, Buchstaller HP, Burgdorf L, Cappel D, Chekler E, Czodrowski P, Dorsch D, et al. Large-scale assessment of binding free energy calculations in active drug discovery projects. *ChemRxiv*. 2020; .
- [4] **Sherborne B**, Shanmugasundaram V, Cheng AC, Christ CD, Desjarlais RL, Duca JS, Lewis RA, Loughney DA, Manas ES, McGaughey GB, et al. Collaborating to improve the use of free-energy and other quantitative methods in drug discovery. *Journal of computer-aided molecular design*. 2016; 30(12):1139–1141.
- [5] **Cournia Z**, Allen B, Sherman W. Relative binding free energy calculations in drug discovery: recent advances and practical considerations. *Journal of chemical information and modeling*. 2017; 57(12):2911–2937.
- [6] **Abel R**, Wang L, Mobley DL, Friesner RA. A critical review of validation, blind testing, and real-world use of alchemical protein-ligand binding free energy calculations. *Current topics in medicinal chemistry*. 2017; 17(23):2577–2585.
- [7] **Ponder JW**, Case DA. Force fields for protein simulations. In: *Advances in protein chemistry*, vol. 66 Elsevier; 2003.p. 27–85.
- [8] **Shirts MR**, Mobley DL, Brown SP. Free-energy calculations in structure-based drug design. *Drug design: structure- and ligand-based approaches*. 2010; p. 61–86.
- [9] **Abel R**, Manas ES, Friesner RA, Farid RS, Wang L. Modeling the value of predictive affinity scoring in preclinical drug discovery. *Current opinion in structural biology*. 2018; 52:103–110.
- [10] **Moraca F**, Negri A, de Oliveira C, Abel R. Application of Free Energy Perturbation (FEP+) to Understanding Ligand Selectivity: A Case Study to Assess Selectivity Between Pairs of Phosphodiesterases (PDE's). *Journal of chemical information and modeling*. 2019; 59(6):2729–2740.
- [11] **Albanese SK**, Chodera JD, Volkamer A, Keng S, Abel R, Wang L. Is structure based drug design ready for selectivity optimization? *BioRxiv*. 2020; .
- [12] **Chodera JD**, Mobley DL, Shirts MR, Dixon RW, Branson K, Pande VS. Alchemical free energy methods for drug discovery: progress and challenges. *Current opinion in structural biology*. 2011; 21(2):150–160.
- [13] **Wang J**, Wolf RM, Caldwell JW, Kollman PA, Case DA. Development and testing of a general amber force field. *Journal of computational chemistry*. 2004; 25(9):1157–1174.
- [14] **Wang J**, Wang W, Kollman PA, Case DA. Automatic atom type and bond type perception in molecular mechanical calculations. *Journal of molecular graphics and modelling*. 2006; 25(2):247–260.
- [15] **Vanommeslaeghe K**, Hatcher E, Acharya C, Kundu S, Zhong S, Shim J, Darian E, Guvench O, Lopes P, Vorobyov I, et al. CHARMM general force field: A force field for drug-like molecules compatible with the CHARMM all-atom additive biological force fields. *Journal of computational chemistry*. 2010; 31(4):671–690.
- [16] **Vanommeslaeghe K**, Raman EP, MacKerell Jr AD. Automation of the CHARMM General Force Field (CGenFF) II: assignment of bonded parameters and partial atomic charges. *Journal of chemical information and modeling*. 2012; 52(12):3155–3168.
- [17] **Roos K**, Wu C, Damm W, Reboul M, Stevenson JM, Lu C, Dahlgren MK, Mondal S, Chen W, Wang L, et al. OPLS3e: Extending force field coverage for drug-like small molecules. *Journal of chemical theory and computation*. 2019; 15(3):1863–1874.
- [18] **Maple JR**, Hwang MJ, Stockfish TP, Dinur U, Waldman M, Ewig CS, Hagler AT. Derivation of class II force fields. I. Methodology and quantum force field for the alkyl functional group and alkane molecules. *Journal of Computational Chemistry*. 1994; 15(2):162–182.

- [19] **Hwang MJ**, Stockfisch T, Hagler A. Derivation of class II force fields. 2. Derivation and characterization of a class II force field, CFF93, for the alkyl functional group and alkane molecules. *Journal of the American Chemical Society*. 1994; 116(6):2515–2525.
- [20] **Dauber-Osguthorpe P**, Hagler AT. Biomolecular force fields: where have we been, where are we now, where do we need to go and how do we get there? *Journal of computer-aided molecular design*. 2019; 33(2):133–203.
- [21] **Hagler AT**. Force field development phase II: Relaxation of physics-based criteria... or inclusion of more rigorous physics into the representation of molecular energetics. *Journal of computer-aided molecular design*. 2019; 33(2):205–264.
- [22] **Shi Y**, Jiao D, Schnieders MJ, Ren P. Trypsin-ligand binding free energy calculation with AMOEBA. In: *2009 Annual International Conference of the IEEE Engineering in Medicine and Biology Society IEEE*; 2009. p. 2328–2331.
- [23] **Bell DR**, Qi R, Jing Z, Xiang JY, Mejias C, Schnieders MJ, Ponder JW, Ren P. Calculating binding free energies of host-guest systems using the AMOEBA polarizable force field. *Physical Chemistry Chemical Physics*. 2016; 18(44):30261–30269.
- [24] **Laury ML**, Wang Z, Gordon AS, Ponder JW. Absolute binding free energies for the SAMPL6 cucurbit [8] uril host-guest challenge via the AMOEBA polarizable force field. *Journal of computer-aided molecular design*. 2018; 32(10):1087–1095.
- [25] **Lin FY**, MacKerell AD. Force fields for small molecules. In: *Biomolecular Simulations* Springer; 2019.p. 21–54.
- [26] **Stern C**, Capturing non-local through-bond effects when fragmenting molecules for quantum chemical torsion scans; 2020. Online; accessed 23 July 2020. <https://chayast.github.io/fragmenter-manuscript/>.
- [27] **Harder E**, Damm W, Maple J, Wu C, Reboul M, Xiang JY, Wang L, Lupyan D, Dahlgren MK, Knight JL, et al. OPLS3: a force field providing broad coverage of drug-like small molecules and proteins. *Journal of chemical theory and computation*. 2016; 12(1):281–296.
- [28] **Maple JR**, Dinur U, Hagler AT. Derivation of force fields for molecular mechanics and dynamics from ab initio energy surfaces. *Proceedings of the National Academy of Sciences*. 1988; 85(15):5350–5354.
- [29] **Mackerell Jr AD**, Feig M, Brooks III CL. Extending the treatment of backbone energetics in protein force fields: Limitations of gas-phase quantum mechanics in reproducing protein conformational distributions in molecular dynamics simulations. *Journal of computational chemistry*. 2004; 25(11):1400–1415.
- [30] **Wang LP**, McKiernan KA, Gomes J, Beauchamp KA, Head-Gordon T, Rice JE, Swope WC, Martínez TJ, Pande VS. Building a more predictive protein force field: a systematic and reproducible route to AMBER-FB15. *The Journal of Physical Chemistry B*. 2017; 121(16):4023–4039.
- [31] **Kang W**, Jiang F, Wu YD. Universal Implementation of a Residue-Specific Force Field Based on CMAP Potentials and Free Energy Decomposition. *Journal of chemical theory and computation*. 2018; 14(8):4474–4486.
- [32] **Best RB**, Mittal J, Feig M, MacKerell Jr AD. Inclusion of many-body effects in the additive CHARMM protein CMAP potential results in enhanced cooperativity of  $\alpha$ -helix and  $\beta$ -hairpin formation. *Biophysical journal*. 2012; 103(5):1045–1051.
- [33] **Perola E**, Charifson PS. Conformational analysis of drug-like molecules bound to proteins: an extensive study of ligand reorganization upon binding. *Journal of medicinal chemistry*. 2004; 47(10):2499–2510.
- [34] **Beierlein FR**, Michel J, Essex JW. A simple QM/MM approach for capturing polarization effects in protein-ligand binding free energy calculations. *The Journal of Physical Chemistry B*. 2011; 115(17):4911–4926.
- [35] **Dubey KD**, Ojha RP. Binding free energy calculation with QM/MM hybrid methods for Abl-Kinase inhibitor. *Journal of biological physics*. 2011; 37(1):69–78.
- [36] **Rathore R**, Sumakanth M, Reddy MS, Reddanna P, Rao AA, Erion MD, Reddy M. Advances in binding free energies calculations: QM/MM-based free energy perturbation method for drug design. *Current pharmaceutical design*. 2013; 19(26):4674–4686.
- [37] **König G**, Hudson PS, Boresch S, Woodcock HL. Multiscale free energy simulations: An efficient method for connecting classical MD simulations to QM or QM/MM free energies using Non-Boltzmann Bennett reweighting schemes. *Journal of chemical theory and computation*. 2014; 10(4):1406–1419.



- [38] **Steinmann C**, Olsson MA, Ryde U. Relative ligand-binding free energies calculated from multiple short QM/MM MD simulations. *Journal of chemical theory and computation*. 2018; 14(6):3228–3237.
- [39] **Yang W**, Cui Q, Min D, Li H. QM/MM alchemical free energy simulations: Challenges and recent developments. In: *Annual Reports in Computational Chemistry*, vol. 6 Elsevier; 2010.p. 51–62.
- [40] **Hudson PS**, Boresch S, Rogers DM, Woodcock HL. Accelerating QM/MM Free Energy Computations via Intramolecular Force Matching. *Journal of Chemical Theory and Computation*. 2018 Dec; 14(12):6327–6335. <https://doi.org/10.1021/acs.jctc.8b00517>, doi: 10.1021/acs.jctc.8b00517, publisher: American Chemical Society.
- [41] **Giese TJ**, York DM. Development of a Robust Indirect Approach for MM→QM Free Energy Calculations That Combines Force-Matched Reference Potential and Bennett's Acceptance Ratio Methods. *Journal of chemical theory and computation*. 2019; 15(10):5543–5562.
- [42] **Von Lilienfeld OA**. Quantum machine learning in chemical compound space. *Angewandte Chemie International Edition*. 2018; 57(16):4164–4169.
- [43] **Smith JS**, Isayev O, Roitberg AE. ANI-1: an extensible neural network potential with DFT accuracy at force field computational cost. *Chemical science*. 2017; 8(4):3192–3203.
- [44] **Galvelis R**, Doerr S, Damas JM, Harvey MJ, De Fabritiis G. A Scalable Molecular Force Field Parameterization Method Based on Density Functional Theory and Quantum-Level Machine Learning. *Journal of chemical information and modeling*. 2019; 59(8):3485–3493.
- [45] **Wang L**, Wu Y, Deng Y, Kim B, Pierce L, Krilov G, Lupyan D, Robinson S, Dahlgren MK, Greenwood J, et al. Accurate and reliable prediction of relative ligand binding potency in prospective drug discovery by way of a modern free-energy calculation protocol and force field. *Journal of the American Chemical Society*. 2015; 137(7):2695–2703.
- [46] **Qiu Y**, Smith DGA, Boothroyd S, Wagner J, Bannan CC, Gokey T, Jang H, Lim VT, Lucas X, Tjanaka B, et al, openforcefield/openforcefields: Version 1.0.0 "Parsley". Zenodo; 2019. doi: 10.5281/zenodo.3483227.
- [47] **Maier JA**, Martinez C, Kasavajhala K, Wickstrom L, Hauser KE, Simmerling C. ff14SB: improving the accuracy of protein side chain and backbone parameters from ff99SB. *Journal of chemical theory and computation*. 2015; 11(8):3696–3713.
- [48] **Jorgensen WL**, Chandrasekhar J, Madura JD, Impey RW, Klein ML. Comparison of simple potential functions for simulating liquid water. *The Journal of chemical physics*. 1983; 79(2):926–935.
- [49] **Devereux C**, Smith JS, Davis KK, Barros K, Zubatyuk R, Isayev O, Roitberg AE. Extending the Applicability of the ANI Deep Learning Molecular Potential to Sulfur and Halogens. *Journal of Chemical Theory and Computation*. 2020; 16(7):4192–4202. <https://doi.org/10.1021/acs.jctc.0c00121>, doi: 10.1021/acs.jctc.0c00121, publisher: American Chemical Society.
- [50] **Song LF**, Lee TS, Zhu C, York DM, Merz Jr KM. Using AMBER18 for Relative Free Energy Calculations. *Journal of chemical information and modeling*. 2019; 59(7):3128–3135.
- [51] **Liang J**, van Abbema A, Balazs M, Barrett K, Berezhkovsky L, Blair W, Chang C, Delarosa D, DeVoss J, Driscoll J, et al. Lead optimization of a 4-aminopyridine benzamide scaffold to identify potent, selective, and orally bioavailable TYK2 inhibitors. *Journal of medicinal chemistry*. 2013; 56(11):4521–4536.
- [52] **Lahey SLJ**, Rowley CN. Simulating protein–ligand binding with neural network potentials. *Chemical Science*. 2020; 11(9):2362–2368.
- [53] **Smith JS**, Nebgen BT, Zubatyuk R, Lubbers N, Devereux C, Barros K, Tretiak S, Isayev O, Roitberg AE. Approaching coupled cluster accuracy with a general-purpose neural network potential through transfer learning. *Nature communications*. 2019; 10(1):1–8.
- [54] **Bennett CH**. Efficient estimation of free energy differences from Monte Carlo data. *Journal of Computational Physics*. 1976; 22(2):245–268.
- [55] **Crooks GE**. Excursions in statistical dynamics. PhD thesis, Citeseer; 1999.
- [56] **Shirts MR**, Bair E, Hooker G, Pande VS. Equilibrium free energies from nonequilibrium measurements using maximum-likelihood methods. *Physical review letters*. 2003; 91(14):140601.
- [57] **Crooks GE**. Nonequilibrium measurements of free energy differences for microscopically reversible Markovian systems. *Journal of Statistical Physics*. 1998; 90(5-6):1481–1487.

- [58] **Shirts MR**, Mobley DL, Chodera JD. Alchemical free energy calculations: ready for prime time? *Annual reports in computational chemistry*. 2007; 3:41–59.
- [59] **Wan S**, Bhati AP, Zasada SJ, Wall I, Green D, Bamborough P, Coveney PV. Rapid and reliable binding affinity prediction of bromodomain inhibitors: a computational study. *Journal of chemical theory and computation*. 2017; 13(2):784–795.
- [60] **Harger M**, Li D, Wang Z, Dalby K, Lagardère L, Piquemal JP, Ponder J, Ren P. Tinker-OpenMM: Absolute and relative alchemical free energies using AMOEBA on GPUs. *Journal of computational chemistry*. 2017; 38(23):2047–2055.
- [61] **Lee TS**, Cerutti DS, Mermelstein D, Lin C, LeGrand S, Giese TJ, Roitberg A, Case DA, Walker RC, York DM. GPU-accelerated molecular dynamics and free energy methods in Amber18: performance enhancements and new features. *Journal of chemical information and modeling*. 2018; 58(10):2043–2050.
- [62] **Jespers W**, Esguerra M, Åqvist J, Gutiérrez-de Terán H. QligFEP: an automated workflow for small molecule free energy calculations in Q. *Journal of cheminformatics*. 2019; 11(1):26.
- [63] **Suruzhon M**, Senapathi T, Bodnarchuk MS, Viner R, Wall ID, Barnett CB, Naidoo KJ, Essex JW. ProtoCaller: Robust Automation of Binding Free Energy Calculations. *Journal of Chemical Information and Modeling*. 2020; 60(4):1917–1921.
- [64] **Gapsys V**, Pérez-Benito L, Aldeghi M, Seeliger D, Van Vlijmen H, Tresadern G, de Groot BL. Large scale relative protein ligand binding affinities using non-equilibrium alchemy. *Chemical Science*. 2020; 11(4):1140–1152.
- [65] **Kuhn M**, Firth-Clark S, Tosco P, Mey AS, Mackey MD, Michel J. Assessment of Binding Affinity via Alchemical Free Energy Calculations. *Journal of Chemical Information and Modeling*. 2020; .
- [66] **Shirts MR**, Pande VS. Comparison of efficiency and bias of free energies computed by exponential averaging, the Bennett acceptance ratio, and thermodynamic integration. *The Journal of chemical physics*. 2005; 122(14):144107.
- [67] **Neal R**. Annealed importance sampling (Technical Report 9805 (revised)). Department of Statistics, University of Toronto. 1998; .
- [68] **Nilmeier JP**, Crooks GE, Minh DD, Chodera JD. Nonequilibrium candidate Monte Carlo is an efficient tool for equilibrium simulation. *Proceedings of the National Academy of Sciences*. 2011; 108(45):E1009–E1018.
- [69] **Jarzynski C**. Nonequilibrium equality for free energy differences. *Physical Review Letters*. 1997; 78(14):2690.
- [70] **Del Moral P**, Doucet A, Jasra A. Sequential monte carlo samplers. *Journal of the Royal Statistical Society: Series B (Statistical Methodology)*. 2006; 68(3):411–436.
- [71] **Neal RM**. Estimating ratios of normalizing constants using linked importance sampling. *arXiv preprint math/0511216*. 2005; .
- [72] **Xu H**. Optimal measurement network of pairwise differences. *Journal of Chemical Information and Modeling*. 2019; 59(11):4720–4728.
- [73] **Sellers BD**, James NC, Gobbi A. A comparison of quantum and molecular mechanical methods to estimate strain energy in druglike fragments. *Journal of chemical information and modeling*. 2017; 57(6):1265–1275.
- [74] **Rai BK**, Sresht V, Yang Q, Unwalla R, Tu M, Mathiowetz AM, Bakken GA. Comprehensive Assessment of Torsional Strain in Crystal Structures of Small Molecules and Protein–Ligand Complexes using ab Initio Calculations. *Journal of Chemical Information and Modeling*. 2019; 59(10):4195–4208.
- [75] **Wei W**, Champion C, Liu Z, Barigye SJ, Labute P, Moitessier N. Torsional Energy Barriers of Biaryls Could Be Predicted by Electron Richness/Deficiency of Aromatic Rings; Advancement of Molecular Mechanics toward Atom-Type Independence. *Journal of chemical information and modeling*. 2019; 59(11):4764–4777.
- [76] **Eastman P**, Swails J, Chodera JD, McGibbon RT, Zhao Y, Beauchamp KA, Wang LP, Simmonett AC, Harrigan MP, Stern CD, et al. OpenMM 7: Rapid development of high performance algorithms for molecular dynamics. *PLoS computational biology*. 2017; 13(7):e1005659.
- [77] **Zubatyuk R**, Smith JS, Leszczynski J, Isayev O. Accurate and transferable multitask prediction of chemical properties with an atoms-in-molecules neural network. *Science advances*. 2019; 5(8):eaav6490.
- [78] **Schütt KT**, Saucedo HE, Kindermans PJ, Tkatchenko A, Müller KR. SchNet—A deep learning architecture for molecules and materials. *The Journal of Chemical Physics*. 2018; 148(24):241722.

- [79] **Unke OT**, Meuwly M. PhysNet: A neural network for predicting energies, forces, dipole moments, and partial charges. *Journal of chemical theory and computation*. 2019; 15(6):3678–3693.
- [80] **Glick ZL**, Metcalf DP, Koutsoukas A, Spronk SA, Cheney DL, Sherrill CD. AP-Net: An atomic-pairwise neural network for smooth and transferable interaction potentials. . 2020; .
- [81] **Gilmer J**, Schoenholz SS, Riley PF, Vinyals O, Dahl GE. Neural message passing for quantum chemistry. arXiv preprint arXiv:170401212. 2017; .
- [82] **Scheen J**, Wu W, Mey AS, Tosco P, Mackey MD, Michel J. A hybrid Alchemical Free Energy/Machine Learning Methodology for the Computation of Hydration Free Energies. *Journal of Chemical Information and Modeling*. 2020; .
- [83] **Ghanakota P**, Bos PH, Konze K, Staker J, Marques G, Marshall K, Leswing K, Abel R, Bhat S. Combining Cloud-Based Free Energy Calculations, Synthetically Aware Enumerations and Goal-Directed Generative Machine Learning for Rapid Large Scale Chemical Exploration and Optimization. *Journal of Chemical Information and Modeling*. 2020; .
- [84] **Joung IS**, Cheatham III TE. Determination of alkali and halide monovalent ion parameters for use in explicitly solvated biomolecular simulations. *The journal of physical chemistry B*. 2008; 112(30):9020–9041.
- [85] **Leimkuhler B**, Matthews C. Robust and efficient configurational molecular sampling via Langevin dynamics. *The Journal of chemical physics*. 2013; 138(17):05B601\_1.
- [86] **Fass J**, Sivak DA, Crooks GE, Beauchamp KA, Leimkuhler B, Chodera JD. Quantifying configuration-sampling error in Langevin simulations of complex molecular systems. *Entropy*. 2018; 20(5):318.
- [87] **Gapsys V**, Seeliger D, de Groot BL. New soft-core potential function for molecular dynamics based alchemical free energy calculations. *Journal of Chemical Theory and Computation*. 2012; 8(7):2373–2382.
- [88] **Gao X**, Ramezanghorbani F, Isayev O, Smith JS, Roitberg AE. TorchANI: A Free and Open Source PyTorch-Based Deep Learning Implementation of the ANI Neural Network Potentials. *Journal of Chemical Information and Modeling*. 2020; 60(7):3408–3415. <https://doi.org/10.1021/acs.jcim.0c00451>, doi: 10.1021/acs.jcim.0c00451, publisher: American Chemical Society.

## 319 Detailed methods

### 320 MM Relative Free Energy Calculations

321 MM relative free energy calculations were performed using the open-source software Perses 0.7.1 [<http://github/choderalab/perses>]. The set of 24 pairwise comparisons for the set of 16 ligands were performed,  
322 as specified in [45]. Simulations were performed for both the bound-complex phase and solvent phase  
323 to afford relative binding free energies using OpenMM 7.4.2 [76]. Protein and ligand files were adapted  
324 from [50] and are available as part of the openmm-forcefields 0.7.1 package [[https://github.com/openmm/](https://github.com/openmm/openmmforcefields)  
325 [openmmforcefields](https://github.com/openmm/openmmforcefields)]. Simulations were performed with AMBER14SB [47] protein forcefield and the OpenFF  
326 1.0.0 "Parsley" small molecule forcefield [46]. The system was solvated with a 9.0 Å padding using TIP3P  
327 water [48] and 150 mM NaCl [84]. Simulations were performed without hydrogen bond constraints using  
328 4 amu hydrogen masses following mass repartitioning. A timestep of 2 fs with a 1 ps<sup>-1</sup> collision rate at 300 K  
329 was performed using a BAOAB Langevin integration scheme [85, 86], using an NPT ensemble at 1.0 atm sam-  
330 pled using a Monte Carlo barostat with molecular scaling. Nonbonded interactions were handled using a 9 Å  
331 cutoff using Particle Mesh Ewald (PME) with a tolerance of  $2.5 \times 10^{-4}$  and long-range dispersion corrections.  
332 The alchemical perturbation was performed using a single topology protocol. The mapping protocol to  
333 generate the single hybrid ligand is performed using the maximum common substructure search (MCSS)  
334 algorithm from the OpenEye Toolkits 2020.0.4 to identify the common 'core' of the molecule. Atoms not  
335 common between the two molecules (not contained in the core) are included as 'unique-old' or 'unique-  
336 new' atoms. The interaction perturbation scheme is described in Figure S.I.2. Softcore steric potentials (see  
337 [87]) with an  $\alpha$  parameter of 0.85.

338  
339 11 equally-spaced  $\lambda$ -windows were used for these calculations, for both the solvent and the complex  
340 phases. 1000 cycles of 250 integration steps (2 fs timestep) were performed, resulting in a total of 5 ns  
341 of sampling per  $\lambda$ -state (55 ns sampling per-phase, per-ligand pair). All-to-all Hamiltonian replica exchange  
342 was attempted every cycle. MBAR was performed on decorrelated replica exchange samples to recover MM  
343 relative free energies and associated uncertainties. The maximum likelihood estimator (MLE) DiffNet [72]

344 was used to compute absolute binding free energies for the set of ligands, and shifted using a single exper-  
 345 imental value. The aforementioned calculations are self-contained operations in the [[https://github.com/  
 346 openforcefield/arsenic](https://github.com/openforcefield/arsenic)] as a graph representation (nodes correspond to ligands and edges correspond to rel-  
 347 ative alchemical transformations). Results are shown in Figure 6 (A and C) and were used as the basis for  
 348 the MM→MM/ML corrected energies, described in the following.

### 349 Bidirectional nonequilibrium switching and ML/MM free energy corrections

350 The bidirectional nonequilibrium protocol was parameterized in accordance with Eq. 2 with 5000 annealing  
 351 steps. MM model and simulation parameters are consistent with those described above.

352 The forward NEQ procedure is as follows for each phase:

---

#### Algorithm 1: Nonequilibrium (NEQ) switching protocol

---

**Input** :  $N_A$  iid system configurations ( $x \in \mathbb{R}^{3N}$ ) from MM relative free energy calculation; the set thereof is denoted  $\mathbf{X}$ .  
 $\lambda$ -dependent nonequilibrium protocol (see Eq. 2).  
 timestep  $\delta t$  [fs]  
 $N_{neq}$  protocol steps, temperature  $T$  [Kelvin], collision rate  $\gamma$  [ $ps^{-1}$ ]

**Output** : Set of final configurations  $\{x_i\}$   
 Set of final reduced works  $\{work_i\}$

**Require**:  $\beta = \frac{1}{k_b T}$   
 $a = e^{-\gamma \delta t}$ ;  $b = \sqrt{1 - e^{-2\gamma \delta t}}$

**for**  $i$  in  $N_A$  **do**  
     select  $x_i \in \mathbf{X}$  ;  
     set step = 0;  $\lambda = 0$  ;  
     select velocity ( $V$ ) from Maxwell-Boltzmann distribution at temperature  $T$  ;  
     set  $work_i = 0$  ;  
     set  $u = \beta U(x_i | \lambda)$  ;  
     **while** step <  $N_{neq}$  **do**  
         step  $\leftarrow$  step + 1 ; ▷ step update  
          $\lambda \leftarrow \frac{\text{step}}{N_{neq}}$  ; ▷ lambda update  
          $u_{\text{new}} \leftarrow \beta U(x_i | \lambda)$  ; ▷ energy update  
          $work_i \leftarrow work_i + u_{\text{new}} - u$  ; ▷ work update  
          $x_i \leftarrow x_i + \frac{V \delta t}{2}$  ; ▷ position update  
          $V \leftarrow V - M^{-1} \beta \nabla U(x_i | \lambda) \delta t$  ; ▷ velocity update  
          $x_i \leftarrow x_i + \frac{V \delta t}{2}$  ; ▷ velocity update  
          $V \leftarrow aV + \frac{b}{\sqrt{\beta}} M^{-1/2} \mathcal{N}(0, 1)$  ; ▷ Ornstein-Uhlenbeck process  
          $x_i \leftarrow x_i + \frac{V \delta t}{2}$  ; ▷ position update  
          $u \leftarrow u_{\text{new}}$  ; ▷ reduced energy reset  
     **end**  
**end**  
**return**  $\{x_i\}$ ,  $\{work_i\}$

---

354 To conduct decorrelation and equilibration at the ML/MM thermodynamic states,  $\{x_i\}$  returned from  
 355 Algorithm 1 is resampled  $N_A$  times (with replacement) w.r.t.  $e^{-work_i}$  from  $\{work_i\}$ . The algorithm is per-  
 356 formed again (in this case, setting  $N_{neq}$  to 5000) whilst maintaining  $\lambda = 1$ ; in this case,  $work_i$  is identically 0.  
 357 Subsequently, Algorithm 1 is conducted in the backward direction (i.e.  $\lambda = 1 - \frac{\text{step}}{N_{neq}}$  in the "lambda update"  
 358 step).

359 The work sets  $\{work_{i,\text{forward}}\}$  from Algorithm 1 and  $\{work_{i,\text{backward}}\}$  from the aforementioned modification  
 360 were then passed to the BAR estimator [<https://github.com/choderalab/pymbar/blob/master/pymbar/bar.py>] to  
 361 maximize the likelihood of the  $\Delta G_{ML/MM}$ . To correct the MM free energy calculations, the complex/solvent  
 362  $\Delta G_{ML/MM}^{\text{complex}} - \Delta G_{ML/MM}^{\text{solvent}}$  differences were added in-place to the MM ligand network nodes, and absolute binding

363 free energies were recomputed with DiffNett [72].

364 For both the complex and solvent phase, 100 decorrelated equilibrium configurations ( $N_A = 100$ ) were  
365 extracted from replica exchange checkpoint files from each relative calculation edge. This treatment re-  
366 sulted in duplicate and independent repeats of ensemble ML/MM bidirectional switching. This resulted in  
367 200 to 700 independent forward/backward work samples for each phase for the 16 ligands, depending on  
368 the degree of each ligand in the relative free energy calculation network. The aggregated bidirectional work  
369 distributions for each ligand and each phase is shown in Figure S.I.1.

370 The forward, resampling, ML/MM endstate simulation (for 10 ps), and backward annealing procedures,  
371 described previously, were used to recover bidirectional work distributions along with the BAR-estimated  
372 free energy correction.

373 The ligand configuration was extracted from the solvent and complex phases and modelled with the  
374 OpenFF 1.0.0 forcefield as used in the MM simulations; however the nonbonded (i.e. steric and electrostatic)  
375 interactions were treated as non-periodic without a cutoff. The ANI2x ligand model was computed using  
376 TorchANI package [<https://github.com/aiqm/torchani>] (ANI2x version 2.1.1)[88].

377 In order to propagate dynamics through the protocol, each velocity update steps are preceded by a force  
378 update step wherein the forces of the MM and ML vacuum ligand systems are computed, scaled appropri-  
379 ately by the value of  $\lambda$ , and added to the appropriate sub-block matrix of the full ligand-and-environment  
380 force matrix.



381 **Supplementary Information**

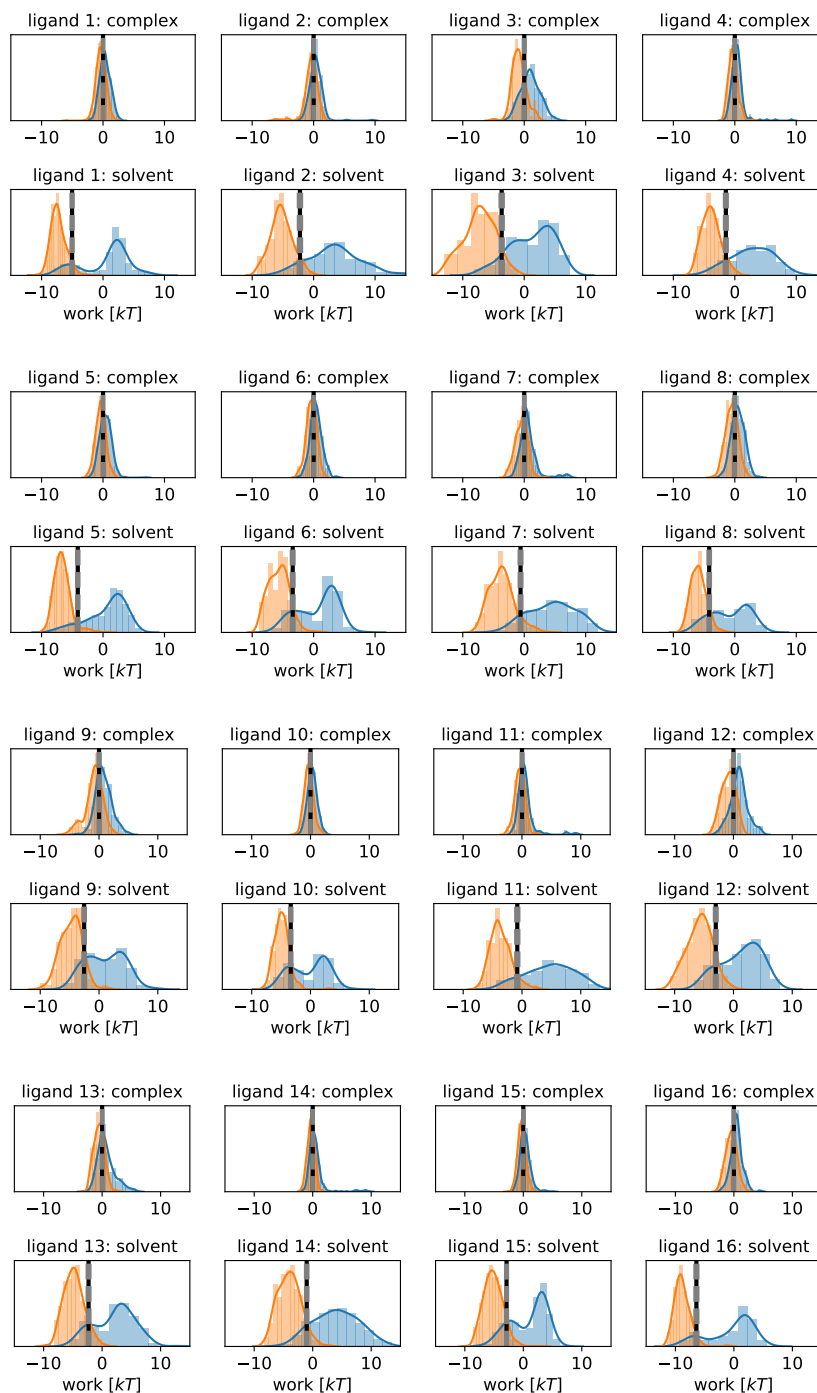

**Appendix 0 Figure S.I.1. Bidirectional NEQ work distributions for Tyk2 congeneric inhibitor series.** Forward work distributions (blue) and (negative) backward work distributions (orange) show sufficient overlap for a BAR free energy calculation. BAR  $\Delta G_{MM \rightarrow MM/ML}$  are shown as vertical black lines, and uncertainties thereof are shown as gray, dotted lines. Both complex and solvent phases are shown.

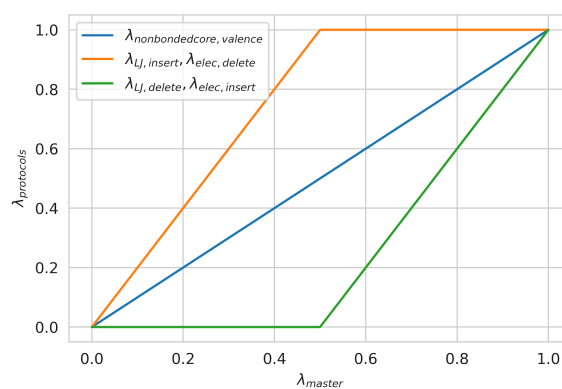

**Appendix 0 Figure S.1.2. Perses relative free energy calculations default alchemical protocol.** The interaction potentials are perturbed linearly in two stages: between  $\lambda$ : 0.0  $\rightarrow$  0.5 the sterics of the unique-new atoms are turned on while the electrostatics of the unique-old atoms are turned off, followed by the turning on of the electrostatics of the unique-new atoms simultaneously with the steric terms of the unique-old atoms being turned off between  $\lambda$ : 0.5  $\rightarrow$  1.0. The parameters of the core atoms are linearly perturbed from  $\lambda$ : 0.  $\rightarrow$  1.0.
